# Supplementary material for: Fungal–fungal co-culture: a primer for generating chemical diversity
Source: PubMed Central journal article supplement — Nat Prod Rep. 2022 Feb 9;39(8):1557–73. doi: 10.1039/d1np00070e (PMC9384855; doi:10.1039/d1np00070e), 2022-02-09

## Fungal-Fungal Co-culture: A Primer for Generating Chemical Diversity

Sonja L. Knowles<sup>a</sup>, Huzefa A. Raja<sup>a</sup>, Christopher D. Roberts<sup>a</sup>, Nicholas H. Oberlies<sup>a</sup>

<sup>a</sup> Department of Chemistry and Biochemistry, University of North Carolina at Greensboro, Greensboro, NC, United States

**Table S1.** Fungal-Fungal Co-culture Papers from 2002 to early 2020

**Figure S1.** Structures of compounds isolated from co-culturing pairing. Refer to Supporting Information Table S1.

| <b>Table S1.</b> Fungal-Fungal Co-culture Papers from 2002 to early 2020 |                                       |                                                                                                                                                                                                                                                                                                                                                                                                                                                                                               |                                                                                                        |                                                                                                                                                                                                                                                                                                                                                             |
|--------------------------------------------------------------------------|---------------------------------------|-----------------------------------------------------------------------------------------------------------------------------------------------------------------------------------------------------------------------------------------------------------------------------------------------------------------------------------------------------------------------------------------------------------------------------------------------------------------------------------------------|--------------------------------------------------------------------------------------------------------|-------------------------------------------------------------------------------------------------------------------------------------------------------------------------------------------------------------------------------------------------------------------------------------------------------------------------------------------------------------|
| Fungi                                                                    | Taxonomy Phylum level/Ordinal level   | Secondary Metabolites (N = New, K= Known)                                                                                                                                                                                                                                                                                                                                                                                                                                                     | Biological Activity                                                                                    | Reference                                                                                                                                                                                                                                                                                                                                                   |
| <i>Aspergillus sulphureus</i> and <i>Isaria felina</i>                   | Ascomycota/Eurotiales vs. Hypocreales | 17-hydroxynotoamide D (N) <b>44</b><br>17-O-ethylnotoamide M (N) <b>45</b><br>10-O-acetylsclerotiamide (N) <b>46</b><br>10-O-ethylsclerotiamide (N) <b>47</b><br>10-O-ethylnotoamide R (N) <b>48</b><br>(-)-notoamide B (K) <b>49</b><br>notoamide C (K) <b>50</b><br>dehydronotoamide C (K) <b>51</b><br>notoamide D (K) <b>52</b><br>notoamide F (K) <b>53</b><br>notoamide Q (K) <b>54</b><br>17-epi-notoamide Q (K) <b>55</b><br>notoamide M (K) <b>56</b><br>sclerotiamide (K) <b>57</b> | Inhibition of colony formation prostate cancer cells at non-cytotoxic concentration 10uM ( <b>45</b> ) | Afiyatullof, S.S., Zhuravleva, O.I., Antonov, A.S., Berdyshev, D.V., Pivkin, M.V., Denisenko, V.A., Popov, R.S., Gerasimenko, A.V., von Amsberg, G., Dyshlovoy, S.A., Leshchenko, E.V., Yurchenko, A.N. Prenylated indole alkaloids from co-culture of marine-derived fungi <i>Aspergillus sulphureus</i> and <i>Isaria felina</i> . J. Antibiot. 2018, 71. |
| <i>Eutypa lata</i> and <i>Botryosphaeria obtuse</i>                      |                                       | 2-nonanone (K) <b>83</b><br>O-methylmellein (K) <b>84</b>                                                                                                                                                                                                                                                                                                                                                                                                                                     | Antifungal ( <b>83, 84</b> )                                                                           | Azzollini, A.; Boggia, L.; Boccard, J.; Sgorbini, B.; Lecoultré, N.; Allard, P.-M.; Rubiolo, P.; Rudaz, S.; Gindro, K.; Bicchi, C. Dynamics of metabolite induction in fungal co-cultures by metabolomics at both volatile and non-volatile levels. Front. Microbiol. 2018, 9, 72.                                                                          |
| <i>Aspergillus sclerotiorum</i> and <i>Penicillium citrinum</i>          | Ascomycota/Onygenales vs. Hypocreales | sclerotiorumin A (N) <b>68</b><br>sclerotiorumin B (N) <b>69</b><br>sclerotiorumin C (N) <b>67</b><br>1-(4-benzyl-1H-pyrrol-3-yl)ethenone (N) <b>64</b><br>aluminiumneohydroxyaspergillin (N) <b>79</b><br>ferrineohydroxyaspergillin (N) <b>80</b>                                                                                                                                                                                                                                           | Cytotoxic ( <b>79</b> )                                                                                | Bao, J., Wang, J., Zhang, X.-Y., Nong, X.-H., Qi, S.-H. New furanone derivatives and alkaloids from the co-culture of marine-derived fungi <i>Aspergillus sclerotiorum</i> and                                                                                                                                                                              |

|                                                                 |  |                                                              |                                                              |                                                                                                                                                                                                                                                                                                                                                                         |
|-----------------------------------------------------------------|--|--------------------------------------------------------------|--------------------------------------------------------------|-------------------------------------------------------------------------------------------------------------------------------------------------------------------------------------------------------------------------------------------------------------------------------------------------------------------------------------------------------------------------|
|                                                                 |  | neospergillic acid (K) <b>178</b>                            |                                                              | Penicillium citrinum. Chem. Biodiv. 2017, 14, e1600327                                                                                                                                                                                                                                                                                                                  |
| <i>Paraconiothyrium variabile</i> and <i>Fusarium oxysporum</i> |  | Beauvericin (K) <b>88</b>                                    | Fungi-static ( <b>88</b> )<br>Cell toxicity at higher levels | Bärenstrauch, M.; Mann, S.; Jacquemin, C.; Bibi, S.; Sylla, O.-K.; Baudouin, E.; Buisson, D.; Prado, S.; Kunz, C. Molecular crosstalk between the endophyte <i>Paraconiothyrium variabile</i> and the phytopathogen <i>Fusarium oxysporum</i> —modulation of lipoxygenase activity and beauvericin production during the interaction. Fungal Genet. Biol. 2020, 103383. |
| <i>Trichophyton rubrum</i> and <i>Bionectria ochroleuca</i> .   |  | 4-hydroxysulfoxy-2,2-dimethylthielavin P (N) <b>179</b>      |                                                              | Bertrand, S., Schumpp, O., Bohni, N., Monod, M., Gindro, K., Wolfender, J.-L. De novo production of metabolites by fungal co-culture of <i>Trichophyton rubrum</i> and <i>Bionectria ochroleuca</i> . J. Nat. Prod. 2013, 76, 1157-1165.                                                                                                                                |
| <i>Sarocladium strictum</i> and <i>Fusarium oxysporum</i>       |  | Fusaric acid (K) <b>180</b>                                  |                                                              | Bohni, N., Hofstetter, V., Gindro, K., Buyck, B., Schumpp, O., Bertrand, S., Monod, M., Wolfender, J.-L. Production of Fusaric Acid by <i>Fusarium</i> spp. in Pure Culture and in Solid Medium Co-Cultures. Molecules 2016, 21, 370.                                                                                                                                   |
| <i>Alternaria tenuissima</i> and <i>Nigrospora sphaerica</i>    |  | Stemphyperlenol (K) <b>1</b><br>Alterperyleneol (K) <b>2</b> | Antifungal ( <b>1</b> )                                      | Chagas, F.O., Dias, L.G., Pupo, M.T. A mixed culture of                                                                                                                                                                                                                                                                                                                 |

|                                                                            |                                                             |                                                                                                                                                                                                                                   |                                                               |                                                                                                                                                                                                                                                                                                                                                        |
|----------------------------------------------------------------------------|-------------------------------------------------------------|-----------------------------------------------------------------------------------------------------------------------------------------------------------------------------------------------------------------------------------|---------------------------------------------------------------|--------------------------------------------------------------------------------------------------------------------------------------------------------------------------------------------------------------------------------------------------------------------------------------------------------------------------------------------------------|
|                                                                            |                                                             | <p>altertoxin I (K) <b>3</b></p> <p>alternariol (K) <b>4</b></p> <p>alternariol monomethyl ether (K) <b>5</b></p>                                                                                                                 |                                                               | <p>endophytic fungi increases production of antifungal polyketides. J. Chem. Ecol. 2013, 39, 1335-1342.</p>                                                                                                                                                                                                                                            |
| <p><i>Paraconiothyrium variabile</i><br/>and <i>Fusarium oxysporum</i></p> |                                                             | <p>13-oxo-9,11-octadecadienoic acid (K) <b>81</b></p> <p>13-hydroperoxy-9,11-octadecadienoic acid (K) <b>82</b></p> <p>Beauvericin (K) <b>88</b></p>                                                                              |                                                               | <p>Combès, A., Ndoye, I., Bance, C., Bruzard, J., Djediat, C., Dupont, J., Nay, B., Prado, S., 2012. Chemical Communication between the Endophytic Fungus <i>Paraconiothyrium Variabile</i> and the Phytopathogen <i>Fusarium oxysporum</i>. PLoS One 7(10), e47313.</p>                                                                               |
| <p>Two mangrove fungi (strain Nos. K38 and E33)</p>                        |                                                             | <p>(-)-byssochlamic acid imide (N) <b>43</b></p>                                                                                                                                                                                  | <p>Antifungal (<b>43</b>)</p>                                 | <p>Ding, W., Lu, Y., Feng, Z., Luo, S., Li, C., 2017. A New Nonadride Derivative from the Co-Culture Broth of Two Mangrove Fungi. Chem. Nat. Compd. 53(4), 691-693.</p>                                                                                                                                                                                |
| <p><i>Eutypa lata</i> and<br/><i>Botryosphaeria obtusa</i></p>             | <p>Ascomycota/<br/>Xylariales vs.<br/>Botryosphaeriales</p> | <p>O-methylmellein (K) <b>84</b></p> <p>Diastereoisomer 1 of 4-Hydroxy-8-O-methylmellein (K) <b>86</b></p> <p>Diastereoisomer 2 of 4-Hydroxy-8-O-methylmellein (K) <b>87</b></p> <p>5-Hydroxy-8-O-methylmellein (N) <b>85</b></p> | <p>Antifungal (<b>84</b>)<br/>Antigerminative (<b>84</b>)</p> | <p>Glaser, G., Gindro, K., Fringeli, J., De Joffrey, J.-P., Rudaz, S., Wolfender, J.-L. Differential analysis of mycoalexins in confrontation zones of grapevine fungal pathogens by ultrahigh pressure liquid chromatography/time-of-flight mass spectrometry and capillary nuclear magnetic resonance. J. Agric. Food Chem. 2009, 57, 1127-1134.</p> |
| <p><i>Pseudoxyalaria</i> sp. X802 and<br/><i>Corioloropsis</i> sp.</p>     |                                                             | <p>pseudoxylallemycin A (N) <b>181</b></p> <p>pseudoxylallemycin B (N) <b>182</b></p>                                                                                                                                             | <p>Antimicrobial (<b>181 – 184</b>)</p>                       | <p>Guo, H., Kreuzenbeck, N.B., Otani, S., Garcia-Altare, M.,</p>                                                                                                                                                                                                                                                                                       |

|                                                                                      |                                           |                                                                                                                                                                                                                                                                                                                                                                                                     |                                   |                                                                                                                                                                                                                                                                                                      |
|--------------------------------------------------------------------------------------|-------------------------------------------|-----------------------------------------------------------------------------------------------------------------------------------------------------------------------------------------------------------------------------------------------------------------------------------------------------------------------------------------------------------------------------------------------------|-----------------------------------|------------------------------------------------------------------------------------------------------------------------------------------------------------------------------------------------------------------------------------------------------------------------------------------------------|
|                                                                                      |                                           | <p>pseudoxylallemycin C (N) <b>183</b></p> <p>pseudoxylallemycin D (N) <b>184</b></p> <p>pseudoxylallemycin E (N) <b>185</b></p> <p>pseudoxylallemycin F (N) <b>186</b></p> <p>eucalyptene A (K) <b>187</b></p> <p>terrillene C (K) <b>188</b></p> <p>19,20-epoxycytochalasin C (K) <b>189</b></p> <p>19,20-epoxycytochalasin D (K) <b>190</b></p> <p>19,20- epoxycytochalasin Q (K) <b>191</b></p> |                                   | <p>Dahse, H.-M., Weigel, C., Aanen, D.K., Hertweck, C., Poulsen, M., Beemelmans, C. Pseudoxylallemycins A–F, Cyclic Tetrapeptides with Rare Allenyl Modifications Isolated from Pseudoxylaria sp. X802: A Competitor of Fungus-Growing Termite Cultivars. <i>Org. Lett.</i> 2016, 18, 3338-3341.</p> |
| <p><i>Hypoxylon rubiginosum</i> (9969) and <i>Hymenoscyphus fraxineus</i>(VER/2)</p> |                                           | <p>Phomopsidin (K) <b>192</b></p> <p>10-hydroxyphomopsidin (N) <b>193</b></p> <p>Viridiol (K) <b>194</b></p>                                                                                                                                                                                                                                                                                        | Antimicrobial ( <b>192, 194</b> ) | <p>Halecker, S.; Wennrich, J.-P.; Rodrigo, S.; Andrée, N.; Rabsch, L.; Baschien, C.; Steinert, M.; Stadler, M.; Surup, F.; Schulz, B. Fungal endophytes for biocontrol of ash dieback: The antagonistic potential of <i>Hypoxylon rubiginosum</i>. <i>Fungal Ecology</i> 2020, 45, 100918.</p>       |
| <p>Phomopsis sp. K38 and <i>Alternaria</i> sp. E33</p>                               | Ascomycota/ Pleosporales vs. Pleosporales | <p>cyclo (D-Pro-L-Tyr-L-Pro-L-Tyr) (N) <b>59</b></p> <p>cyclo (Gly-L-Phe-L-Pro-L-Tyr) (N) <b>58</b></p>                                                                                                                                                                                                                                                                                             | Antifungal ( <b>58,59</b> )       | <p>Huang, S., Ding, W., Li, C., Cox, D. Two new cyclopeptides from the co-culture broth of two marine mangrove fungi and their antifungal activity. <i>Pharmacogn. Mag.</i> 2014, 10, 410-414.</p>                                                                                                   |
| <p><i>Aspergillus fischeri</i> and <i>Xylaria flabelliformis</i></p>                 |                                           | <p>Sartorypyrone A (K) <b>98</b></p> <p>Aszonalenin (K) <b>92</b></p> <p>Acetylaszonalenin (K) <b>93</b></p> <p>Fumitremorgin A (K) <b>89</b></p> <p>Fumitremorgin B (K) <b>90</b></p> <p>C-11 epimer of verruclogen TR-2 <b>91</b></p>                                                                                                                                                             |                                   | <p>Knowles, S. L.; Raja, H. A.; Isawi, I. H.; Flores-Bocanegra, L.; Reggio, P. H.; Pearce, C. J.; Burdette, J. E.; Rokas, A.; Oberlies, N. H. Wheldone: Characterization of a Unique Scaffold from</p>                                                                                               |

|                                                                                       |                                                        |                                                                                                                                                                                                                                                                                                                                                                                                               |                                                                      |                                                                                                                                                                                                                                                                                                                                                              |
|---------------------------------------------------------------------------------------|--------------------------------------------------------|---------------------------------------------------------------------------------------------------------------------------------------------------------------------------------------------------------------------------------------------------------------------------------------------------------------------------------------------------------------------------------------------------------------|----------------------------------------------------------------------|--------------------------------------------------------------------------------------------------------------------------------------------------------------------------------------------------------------------------------------------------------------------------------------------------------------------------------------------------------------|
|                                                                                       |                                                        | <p>Griseofulvin (K) <b>94</b></p> <p>Dechlorogriseofulvin (K) <b>95</b></p> <p>Dechloro-5-hydroxygriseofulvin (K) <b>96</b></p> <p>5-hydroxygriseofulvin (K) <b>108</b></p> <p>7-O-acetylcytochalasin B (K) <b>97</b></p> <p>hirsutatin A (K) <b>103</b></p> <p>zygosporin E (K) <b>102</b></p> <p>cytochalasin C (K) <b>99</b></p> <p>cytochalasin D (K) <b>100</b></p> <p>cytochalasin Q (K) <b>101</b></p> |                                                                      | <p>the Coculture of <i>Aspergillus fischeri</i> and <i>Xylaria flabelliformis</i>. Org. Lett. 2020, 22, 1878-1882.</p>                                                                                                                                                                                                                                       |
| <p><i>Aspergillus fischeri</i> and <i>Xylaria cubensis</i></p>                        | <p>Ascomycota/<br/>Eurotiales vs.<br/>Xylariales</p>   | <p>Wheldone (N) <b>104</b></p>                                                                                                                                                                                                                                                                                                                                                                                | <p>Cytotoxic (<b>104</b>)</p>                                        | <p>Knowles, S. L.; Raja, H. A.; Wright, A. J.; Lee, A. M. L.; Caesar, L. K.; Cech, N. B.; Mead, M. E.; Steenwyk, J. L.; Ries, L.; Goldman, G. H.; Rokas, A.; Oberlies, N. H. Mapping the Fungal Battlefield: Using in situ Chemistry and Deletion Mutants to Monitor Interspecific Chemical Interactions Between Fungi. Front. Microbiol. 2019, 10, 285.</p> |
| <p><i>Penicillium</i> sp. and<br/><i>Trichoderma</i> sp.</p>                          |                                                        | <p>(Z)-2-ethylhex-2-enedioic acid (N) <b>195</b></p> <p>(E)-4-oxo-2-propylideneoct-7-enoic acid (N) <b>196</b></p>                                                                                                                                                                                                                                                                                            |                                                                      | <p>Kossuga, M.H., Ferreira, A.G., Sette, L.D., Berlinck, R.G.S. Two Polyketides from a Co-culture of Two Marine-derived Fungal Strains. Nat. Prod. Commun. 2013, 8, 721-724.</p>                                                                                                                                                                             |
| <p><i>Camporesia sambuci</i> FT1061<br/>and <i>Epicoccum sorghinum</i><br/>FT1062</p> | <p>Ascomycota/<br/>Xylariales vs.<br/>Pleosporales</p> | <p>11S-hydroxy-1-methoxyfusaric acid (N) <b>34</b></p> <p>epicoccarine B (K) <b>33</b></p> <p>(+)-epipyridone (K) <b>35</b></p> <p>D8646-2-6 (K) <b>36</b></p>                                                                                                                                                                                                                                                | <p>Antifungal (<b>36, 37</b>)<br/>Anti-proliferative (<b>33</b>)</p> | <p>Li, C., Sarotti, A., Yang, B., Turkson, J., Cao, S. A New N-methoxypyridone from the Co-Cultivation of Hawaiian Endophytic Fungi <i>Camporesia</i></p>                                                                                                                                                                                                    |

|                                                        |                                                                 |                                                                                                                                              |                                 |                                                                                                                                                                                                                                                                                    |
|--------------------------------------------------------|-----------------------------------------------------------------|----------------------------------------------------------------------------------------------------------------------------------------------|---------------------------------|------------------------------------------------------------------------------------------------------------------------------------------------------------------------------------------------------------------------------------------------------------------------------------|
|                                                        |                                                                 | iso-D8646-2-6 (K) <b>37</b>                                                                                                                  |                                 | sambuci FT1061 and Epicoccum sorghinum FT1062. Molecules 2017, 22, 1166                                                                                                                                                                                                            |
| <i>Phomopsis</i> sp. K38 and <i>Alternaria</i> sp. E33 | Ascomycota/<br>Pleosporales vs.<br>Pleosporales                 | cyclo-(L-leucyl-<br>trans-4-hydroxy-L-prolyl-D-leucyl-trans-4-<br>hydroxy-L-proline) (N) <b>60</b>                                           | Antifungal ( <b>60</b> )        | Li, C., Wang, J., Luo, C., Ding, W., Cox, D.G. A new cyclopeptide with antifungal activity from the co-culture broth of two marine mangrove fungi. Nat. Prod. Res. 2014, 28, 616-621.                                                                                              |
| <i>Phomopsis</i> sp. K38 and <i>Alternaria</i> sp. E33 | Ascomycota/<br>Pleosporales vs.<br>Pleosporales                 | 8-hydroxy-3-methyl-9-oxo-9H-xanthene-1-<br>carboxylic acid methyl ether (N) <b>61</b>                                                        | Antifungal ( <b>61</b> )        | Li, C., Zhang, J., Shao, C., Ding, W., She, Z., Lin, Y. A new xanthone derivative from the co-culture broth of two marine fungi (strain No. E33 and K38). Chem. Nat. Compd. 2011, 47, 382-384.                                                                                     |
| <i>Phomopsis</i> sp. K38 and <i>Alternaria</i> sp. E33 | Ascomycota/<br>Pleosporales vs.<br>Pleosporales                 | (-)-byssochlamic acid bisdiimide (N) <b>42</b>                                                                                               | Weak cytotoxicity ( <b>42</b> ) | Li, C.-Y.; Ding, W.-J.; Shao, C.-L.; She, Z.-G.; Lin, Y.-C. A new diimide derivative from the co-culture broth of two mangrove fungi (strain no. E33 and K38). Journal of Asian Natural Products Research 2010, 12, 809-813                                                        |
| <i>Phoma</i> sp. and <i>Armillaria</i> sp.             | Ascomycota vs.<br>Basidiomycota/Pleosp<br>orales vs. Agaricales | Phexandiol A (N) <b>10</b><br>Phexandiol B (N) <b>11</b><br>Phomester A (N) <b>7</b><br>Phomester B (N) <b>8</b><br>Phomester C (N) <b>9</b> |                                 | Li, H.-T., Zhou, H., Duan, R.-T., Li, H.-Y., Tang, L.-H., Yang, X.-Q., Yang, Y.-B., Ding, Z.-T. Inducing Secondary Metabolite Production by Co-culture of the Endophytic Fungus <i>Phoma</i> sp. and the Symbiotic Fungus <i>Armillaria</i> sp. J. Nat. Prod. 2019, 82, 1009–1013. |

|                                                                                  |                                             |                                                                                                                                                                                                                                                                                                 |                                        |                                                                                                                                                                                                                                                                                                |
|----------------------------------------------------------------------------------|---------------------------------------------|-------------------------------------------------------------------------------------------------------------------------------------------------------------------------------------------------------------------------------------------------------------------------------------------------|----------------------------------------|------------------------------------------------------------------------------------------------------------------------------------------------------------------------------------------------------------------------------------------------------------------------------------------------|
| Sexual <i>Aspergillus alliaceus</i> and asexual <i>Aspergillus alliaceus</i>     | Ascomycota/<br>Eurotiales vs.<br>Eurotiales | Allianthrone A (N) <b>18</b><br>Allianthrone B (N) <b>19</b><br>Allianthrone C (N) <b>20</b>                                                                                                                                                                                                    | Cytotoxic ( <b>18</b> )                | Mandelare, P.; Adpressa, D.; Kaweessa, E.; Zakharov, L.; Loesgen, S. Coculture of two developmental stages of a marine-derived <i>Aspergillus alliaceus</i> results in the production of the cytotoxic bianthrone allianthrone A. <i>J. Nat. Prod.</i> 2018, 81, 1014-1022.                    |
| <i>Penicillium citrinum</i> and <i>Beauveria felina</i>                          |                                             | Citrifelin A (N) <b>109</b><br>Citrifelin B (N) <b>110</b><br>dicitrinin A (K) <b>111</b><br>dihydrocitrinone (K) <b>112</b><br>decarboxydihydrocitrinone (K) <b>113</b><br>destruxin A (K) <b>114</b><br>roseotoxin B (K) <b>115</b><br>isaridin A (K) <b>116</b><br>isaridin B (K) <b>117</b> | Antimicrobial ( <b>109, 110, 113</b> ) | Meng, L.-H., Liu, Y., Li, X.-M., Xu, G.-M., Ji, N.-Y., Wang, B.-G., 2015. Citrifelins A and B, Citrinin Adducts with a Tetracyclic Framework from Cocultures of Marine-Derived Isolates of <i>Penicillium citrinum</i> and <i>Beauveria felina</i> . <i>J. Nat. Prod.</i> 2015, 78, 2301-2305. |
| <i>Talaromyces pinophilus</i> and <i>Paraphaeosphaeria</i> sp.                   |                                             | talarodone A (N) <b>118</b><br>penicidone C (K) <b>119</b><br>penicidone D (K) <b>120</b>                                                                                                                                                                                                       |                                        | Murakami, S.; Hayashi, N.; Inomata, T.; Kato, H.; Hitora, Y.; Tsukamoto, S. Induction of secondary metabolite production by fungal co-culture of <i>Talaromyces pinophilus</i> and <i>Paraphaeosphaeria</i> sp. <i>Journal of Natural Medicines</i> 2020, 1-5.                                 |
| <i>Penicillium pinophilum</i> FKI-5653 and <i>Trichoderma harzianum</i> FKI-5655 |                                             | secopenicillide C (N) <b>121</b><br>penicillide (K) <b>122</b><br>MC-141 (K) <b>123</b><br>pestalasin A (K) <b>124</b><br>stromemycin (K) <b>125</b>                                                                                                                                            |                                        | Nonaka, K., Abe, T., Iwatsuki, M., Mori, M., Yamamoto, T., Shiomi, K., Omura, S., Masuma, R. Enhancement of metabolites productivity of <i>Penicillium</i>                                                                                                                                     |



|                                                                     |                                                            |                                                                                              |                                    |                                                                                                                                                                                                                                  |
|---------------------------------------------------------------------|------------------------------------------------------------|----------------------------------------------------------------------------------------------|------------------------------------|----------------------------------------------------------------------------------------------------------------------------------------------------------------------------------------------------------------------------------|
|                                                                     |                                                            |                                                                                              |                                    | pinophilum FKI-5653, by co-culture with Trichoderma harzianum FKI-5655. J. Antibiot. 2011, 64, 769-774.                                                                                                                          |
| <i>Talaromyces siamensis</i> FKA-61 and <i>Phomopsis</i> sp. FKA-62 |                                                            | BE-31405 (K) <b>126</b>                                                                      | Antifungal( <b>126</b> )           | Nonaka, K., Iwatsuki, M., Horiuchi, S., Shiomi, K., Omura, S., Masuma, R. Induced production of BE-31405 by coculturing of <i>Talaromyces siamensis</i> FKA-61 with a variety of fungal strains. J. Antibiot. 2015, 68, 573-578. |
| <i>Irpex lacteus</i> and <i>Phaeosphaeria oryzae</i>                | Basidiomycota vs. Ascomycota/ Polyporales vs. Pleosporales | Irpexine (N) <b>41</b><br>Hypoxyxylone (K) <b>40</b>                                         |                                    | Sadahiro, Y.; Kato, H.; Williams, R. M.; Tsukamoto, S. Irpexine, an Isoindolinone Alkaloid Produced by Coculture of Endophytic Fungi, <i>Irpex lacteus</i> and <i>Phaeosphaeria oryzae</i> . J. Nat. Prod. 2020, 85, 1368-1373.  |
| <i>Chaunopycnis</i> sp. and <i>Trichoderma hamatum</i>              | Ascomycota/ Hypocreales vs. Hypocreales                    | chaunopyran A (N) <b>78</b><br>pyridoxatin (K) <b>66</b><br>methyl-pyridoxatin (N) <b>65</b> |                                    | Shang, Z., Salim, A.A., Capon, R.J. Chaunopyran A: Co-Cultivation of Marine Mollusk-Derived Fungi Activates a Rare Class of 2-Alkenyl-Tetrahydropyran. J. Nat. Prod. 2017, 80, 1167-1172.                                        |
| <i>Trametes robiniophila</i> Murr and <i>Pleurotus ostreatus</i>    |                                                            | postrediene A (N) <b>127</b><br>postrediene B (N) <b>128</b><br>postrediene C (N) <b>129</b> | Antifungal( <b>127, 128, 129</b> ) | Shen, X.-T., Mo, X.-H., Zhu, L.-P., Tan, L.-L., Du, F.-Y., Wang, Q.-W., Zhou, Y.-M., Yuan, X.-J., Qiao, B., Yang, S. Unusual and highly bioactive sesterterpenes synthesized by                                                  |

|                                                                         |                                             |                                                                                                                                                                                                                                                                                                                |                                  |                                                                                                                                                                                                                                                                               |
|-------------------------------------------------------------------------|---------------------------------------------|----------------------------------------------------------------------------------------------------------------------------------------------------------------------------------------------------------------------------------------------------------------------------------------------------------------|----------------------------------|-------------------------------------------------------------------------------------------------------------------------------------------------------------------------------------------------------------------------------------------------------------------------------|
|                                                                         |                                             |                                                                                                                                                                                                                                                                                                                |                                  | Pleurotus ostreatus during the co-culture with Trametes robiniophila Murr. Appl. Environ. Microbiol. 2019, 85, AEM.00293-19                                                                                                                                                   |
| <i>Paraconiothyrium</i> SSM001 and <i>Phomopsis</i> sp.                 |                                             | Taxol (K) <b>130</b>                                                                                                                                                                                                                                                                                           |                                  | Soliman, S.S.M., Raizada, M.N. Interactions between co-habiting fungi elicit synthesis of Taxol from an endophytic fungus in host Taxus plants. Front. Microbiol. 2013, 4, 3                                                                                                  |
| <i>Penicillium fuscum</i> and <i>Penicillium camembertii/clavigerum</i> | Ascomycota/<br>Eurotiales vs.<br>Eurotiales | berkeleylactone A (N) <b>70</b><br>berkeleylactone B (N) <b>71</b><br>berkeleylactone C (N) <b>72</b><br>berkeleylactone D (N) <b>73</b><br>berkeleylactone E (N) <b>74</b><br>berkeleylactone F (N) <b>75</b><br>berkeleylactone G (N) <b>76</b><br>berkeleylactone H (N) <b>77</b><br>A26771B (K) <b>197</b> | Antimicrobial ( <b>70 - 76</b> ) | Stierle, A.A., Stierle, D.B., Decato, D., Priestley, N.D., Alverson, J.B., Hoody, J., McGrath, K., Klepacki, D., The Berkeleylactones, Antibiotic Macrolides from Fungal Coculture. J. Nat. Prod. 2017, 80, 1150-1160.                                                        |
| <i>Moniliophthora roreri</i> and <i>Trichoderma harzianum</i>           |                                             | T39 butenolide (K) <b>107</b><br>Harzianolide (K) <b>106</b><br>Sorbicillinol (K) <b>105</b>                                                                                                                                                                                                                   |                                  | Tata, A., Perez, C., Campos, M.L., Bayfield, M.A., Eberlin, M.N., Ifa, D.R. Imprint Desorption Electrospray Ionization Mass Spectrometry Imaging for Monitoring Secondary Metabolites Production during Antagonistic Interaction of Fungi. Anal. Chem. 2015, 87, 12298-12305. |
| Two Marine Fungi (STRAIN Nos. E33 AND K38) (Wang, J.                    | NA                                          | Ethyl 5-Ethoxy-2-formyl-3-hydroxy-4-methylbenzoate (N) <b>63</b>                                                                                                                                                                                                                                               | Antifungal ( <b>63</b> )         | Wang, J., Ding, W., Li, C., Huang, S., She,                                                                                                                                                                                                                                   |

|                                                            |  |                                                                                                                                                                                                                                                                                                                                                                                                                                                                                                                                                                                                                                                                        |                                                                      |                                                                                                                                                                                                                                                                          |
|------------------------------------------------------------|--|------------------------------------------------------------------------------------------------------------------------------------------------------------------------------------------------------------------------------------------------------------------------------------------------------------------------------------------------------------------------------------------------------------------------------------------------------------------------------------------------------------------------------------------------------------------------------------------------------------------------------------------------------------------------|----------------------------------------------------------------------|--------------------------------------------------------------------------------------------------------------------------------------------------------------------------------------------------------------------------------------------------------------------------|
| et al., 2013)                                              |  |                                                                                                                                                                                                                                                                                                                                                                                                                                                                                                                                                                                                                                                                        |                                                                      | Z., Lin, Y. A New Polysubstituted Benzaldehyde from the co-culture broth of Two Marine Fungi (Strains Nos. E33 and K38). Chem. Nat. Compd. 2013, 49, 799-802.                                                                                                            |
| Fungi E33 and K38 (Wang et al., 2015)                      |  | 7-( $\gamma,\gamma$ -dimethylallyloxy)-6-hydroxy-4-methylcoumarin (N) <b>62</b>                                                                                                                                                                                                                                                                                                                                                                                                                                                                                                                                                                                        | Antifungal ( <b>62</b> )                                             | Wang, J., Huang, S., Li, C., Ding, W., She, Z., Li, C. A New Coumarin Produced by Mixed Fermentation of Two Marine Fungi. Chem. Nat. Compd. 2015, 51, 239-241.                                                                                                           |
| <i>Fusarium tricinctum</i> and <i>Fusarium begoniae</i>    |  | subenniatiin A (N) <b>131</b><br>subenniatiin B (N) <b>132</b>                                                                                                                                                                                                                                                                                                                                                                                                                                                                                                                                                                                                         |                                                                      | Wang, J.-p., Lin, W., Wray, V., Lai, D., Proksch, P. Induced Production of Depsipeptides by Co-Culturing <i>Fusarium tricinctum</i> and <i>Fusarium begoniae</i> . Tetrahedron Lett. 2013, 54, 2492-2496.                                                                |
| <i>Aspergillus flavipes</i> and <i>Chaetomium globosum</i> |  | Aspochalasinol A (N) <b>133</b><br>Aspochalasinol B (N) <b>134</b><br>Aspochalasinol C (N) <b>135</b><br>Aspochalasinol D (N) <b>136</b><br>Oxichaetoglobosin A (N) <b>137</b><br>Oxichaetoglobosin B (N) <b>138</b><br>Oxichaetoglobosin C (N) <b>139</b><br>Oxichaetoglobosin D (N) <b>140</b><br>Oxichaetoglobosin E (N) <b>141</b><br>Oxichaetoglobosin F (N) <b>142</b><br>Oxichaetoglobosin G (N) <b>143</b><br>Oxichaetoglobosin H (N) <b>144</b><br>Oxichaetoglobosin I (N) <b>145</b><br>chaetoglobosin D (K) <b>146</b><br>chaetoglobosin C (K) <b>147</b><br>epicoccine (K) <b>148</b><br>epicocconigrone (K) <b>149</b><br>chaetomugilide B (K) <b>150</b> | antiproliferative activities ( <b>140, 143, 135, 139, 141, 142</b> ) | Wang, W.; Gong, J.; Liu, X.; Dai, C.; Wang, Y.; Li, X.-N.; Wang, J.; Luo, Z.; Zhou, Y.; Xue, Y.; Zhu, H.; Chen, C.; Zhang, Y. Cytochalasins produced by the coculture of <i>Aspergillus flavipes</i> and <i>Chaetomium globosum</i> . J. Nat. Prod. 2018, 81, 1578-1587. |
| <i>Trametes versicolor</i> and                             |  | 2,5,6-trihydroxy-4,6-diphenylcyclohex-4-ene-                                                                                                                                                                                                                                                                                                                                                                                                                                                                                                                                                                                                                           | Antioxidant and anticancer                                           | Xu, X.-Y., Shen, X.-                                                                                                                                                                                                                                                     |

|                                                                          |                                      |                                                                                                                                                                                       |                                           |                                                                                                                                                                                                                                                                                                                                 |
|--------------------------------------------------------------------------|--------------------------------------|---------------------------------------------------------------------------------------------------------------------------------------------------------------------------------------|-------------------------------------------|---------------------------------------------------------------------------------------------------------------------------------------------------------------------------------------------------------------------------------------------------------------------------------------------------------------------------------|
| <i>Ganoderma applanatum</i>                                              |                                      | 1,3-dione) (N) <b>151</b><br>oresellinic acid (N) <b>152</b>                                                                                                                          | <b>(151, 152)</b>                         | T., Yuan, X.-J., Zhou, Y.-M., Fan, H., Zhu, L.-P., Du, F.-Y., Sadilek, M., Yang, J., Qiao, B., Yang, S. Metabolomics Investigation of an Association of Induced Features and Corresponding Fungus during the Co-culture of <i>Trametes versicolor</i> and <i>Ganoderma applanatum</i> . <i>Front. Microbiol.</i> 2018, 8, 2647. |
| <i>Aspergillus sydowii</i> EN-534 and <i>Penicillium citrinum</i> EN-535 | Ascomycota/Eurotiales vs. Eurotiales | seco-penicitrinol A (N) <b>21</b><br>penicitrinol L (N) <b>22</b>                                                                                                                     | Moderate anti-influenza <b>(21)</b>       | Yang, S.-Q., Li, X.-M., Li, X., Li, H.-L., Meng, L.-H., Wang, B.-G. New citrinin analogues produced by coculture of the marine algal-derived endophytic fungal strains <i>Aspergillus sydowii</i> EN-534 and <i>Penicillium citrinum</i> EN-535. <i>Phytochem. Lett.</i> 2018, 25, 191-195                                      |
| <i>Trametes versicolor</i> and <i>Ganoderma applanatum</i>               |                                      | 3-phenyllactic acid (K) <b>153</b><br>N-(4-methoxyphenyl)formamide 2-O- $\beta$ -D-xyloside (N) <b>154</b><br>N-(4-methoxyphenyl)formamide 2-O- $\beta$ -D-xylobioside (N) <b>155</b> |                                           | Yao, L.; Zhu, L.-P.; Xu, X.-Y.; Tan, L.-L.; Sadilek, M.; Fan, H.; Hu, B.; Shen, X.-T.; Yang, J.; Qiao, B.; Yang, S. Discovery of novel xylosides in co-culture of basidiomycetes <i>Trametes versicolor</i> and <i>Ganoderma applanatum</i> by integrated metabolomics and bioinformatics. <i>Sci. Rep.</i> 2016, 6, 33237.     |
| <i>Penicillium crustosum</i> PRB-2 and <i>Xylaria</i> sp. HDN13-249      |                                      | Penixylarin A (N) <b>156</b><br>Penixylarin B (N) <b>157</b>                                                                                                                          | Antibacterial <b>(157, 158, 160, 161)</b> | Yu, G., Sun, Z., Peng, J., Zhu, M., Che, Q., Zhang, G., Zhu, T.,                                                                                                                                                                                                                                                                |

|                                                               |                                                         |                                                                                                                                                                                              |                            |                                                                                                                                                                                                                                                          |
|---------------------------------------------------------------|---------------------------------------------------------|----------------------------------------------------------------------------------------------------------------------------------------------------------------------------------------------|----------------------------|----------------------------------------------------------------------------------------------------------------------------------------------------------------------------------------------------------------------------------------------------------|
|                                                               |                                                         | Penixylarin C (N) <b>158</b><br>Penixylarin D (N) <b>159</b><br>1,3-dihydroxy-5-(12-hydroxyheptadecyl)benzene (K) <b>160</b><br>1,3-dihydroxy-5-(12-sulfoxyheptadecyl)benzene (K) <b>161</b> |                            | Gu, Q., Li, D. Secondary Metabolites Produced by Combined Culture of <i>Penicillium crustosum</i> and a <i>Xylaria</i> sp. J. Nat. Prod. 2019, 82, 2013–2017                                                                                             |
| <i>Talaromyces aculeatus</i> and <i>Penicillium variabile</i> |                                                         | Penitalarin A (N) <b>162</b><br>Penitalarin B (N) <b>163</b><br>Penitalarin C (N) <b>164</b><br>nafuredin B (N) <b>165</b><br>nafuredin A (K) <b>166</b>                                     | Cytotoxic ( <b>165</b> )   | Zhang, Z., He, X., Zhang, G., Che, Q., Zhu, T., Gu, Q., Li, D. Inducing Secondary Metabolite Production by Combined Culture of <i>Talaromyces aculeatus</i> and <i>Penicillium variabile</i> . J. Nat. Prod. 2017, 80, 3167-3171                         |
| <i>Nigrospora oryzae</i> and <i>Beauveria bassiana</i>        | Ascomycota/Xylariales vs. Hypocreales                   | Nigbeauvin A (N) <b>28</b><br>Nigbeauvin B (N) <b>29</b><br>Nigbeauvin C (N) <b>30</b><br>Nigbeauvin D (N) <b>31</b><br>Nigbeauvin E (N) <b>32</b>                                           |                            | Zhang, Z.-X., Yang, X.-Q., Zhou, Q.-Y., Wang, B.-Y., Hu, M., Yang, Y.-B., Zhou, H., Ding, Z.-T. New Azaphilones from <i>Nigrospora oryzae</i> Co-Cultured with <i>Beauveria bassiana</i> . Molecules 2018, 23, 1816.                                     |
| <i>Nigrospora oryzae</i> and <i>Irpex lacteus</i>             | Ascomycota vs. Basidiomycota/Xylariales vs. Polyporales | Nigirpexin A (N) <b>23</b><br>Nigirpexin B (N) <b>24</b><br>Nigirpexin C (N) <b>25</b><br>Nigirpexin D (N) <b>26</b><br>Nigrosirpexin A (N) <b>27</b>                                        |                            | Zhou, Q.-Y., Yang, X.-Q., Zhang, Z.-X., Wang, B.-Y., Hu, M., Yang, Y.-B., Zhou, H., Ding, Z.-T. New azaphilones and tremulane sesquiterpene from endophytic <i>Nigrospora oryzae</i> cocultured with <i>Irpex lacteus</i> . Fitoterapia 2018, 130, 26-30 |
| Two isolates of <i>Aspergillus</i> sp.                        | Ascomycota/Eurotiales vs. Eurotiales                    | Aspergicin (N) <b>6</b><br>Neoaspergilliac acid (K) <b>178</b>                                                                                                                               | Antibacterial ( <b>6</b> ) | Zhu, F., Chen, G., Chen, X., Huang, M., Wan, X. Aspergicin, a new antibacterial alkaloid produced by mixed fermentation of                                                                                                                               |

|                                                                                            |    |                                                                                                                                                                                                                                                                                                                                                             |                                                                |                                                                                                                                                                                                                                                                                                                                                                                                                                                                                                                         |
|--------------------------------------------------------------------------------------------|----|-------------------------------------------------------------------------------------------------------------------------------------------------------------------------------------------------------------------------------------------------------------------------------------------------------------------------------------------------------------|----------------------------------------------------------------|-------------------------------------------------------------------------------------------------------------------------------------------------------------------------------------------------------------------------------------------------------------------------------------------------------------------------------------------------------------------------------------------------------------------------------------------------------------------------------------------------------------------------|
|                                                                                            |    |                                                                                                                                                                                                                                                                                                                                                             |                                                                | two marine-derived mangrove epiphytic fungi. Chem. Nat. Compd. 2011, 47, 767-769.                                                                                                                                                                                                                                                                                                                                                                                                                                       |
| Marine fungal strains (Nos. 1924 and 3893)                                                 | NA | Marinamide (N) <b>38</b><br>methyl ester Marinamide (N) <b>39</b>                                                                                                                                                                                                                                                                                           | Cytotoxic ( <b>38, 39</b> )<br>Antibacterial ( <b>38, 39</b> ) | Zhu, F., Lin, Y. Marinamide, a novel alkaloid and its methyl ester produced by the application of mixed fermentation technique to two mangrove endophytic fungi from the South China Sea. Chinese Sci. Bull. 2006, 51, 1426-1430.<br><br>Structural revision<br>Zhu, F.; Chen, G.; Wu, J.; Pan, J. Structure revision and cytotoxic activity of marinamide and its methyl ester, novel alkaloids produced by co-cultures of two marine-derived mangrove endophytic fungi. Natural product research 2013, 27, 1960-1964. |
| <i>Nigrospora oryzae</i> and <i>Collectotrichum gloeosporioides</i> , <i>Irpex lacteus</i> |    | nigrosirpexin B (N) <b>167</b><br>nigrosirpexin C (N) <b>168</b><br>nigirpexin E (N) <b>169</b><br>nigrosirpexin D (N) <b>170</b><br>nigrosirpexin E (N) <b>171</b><br>nigcollin A (N) <b>172</b><br>nigcollin B (N) <b>173</b><br>nigcollin C (N) <b>174</b><br>nigcollin D (N) <b>175</b><br>nigcollin E (N) <b>176</b><br>nigrosirpexin F (N) <b>177</b> |                                                                | Shi, L.-J.; Wu, Y.-M.; Yang, X.-Q.; Xu, T.-T.; Yang, S.; Wang, X.-Y.; Yang, Y.-B.; Ding, Z.-T. The Cocultured <i>Nigrospora oryzae</i> and <i>Collectotrichum gloeosporioides</i> , <i>Irpex lacteus</i> , and the Plant Host <i>Dendrobium officinale</i> Bidirectionally Regulate the Production of Phytotoxins by Anti-phytopathogenic Metabolites. J. Nat.                                                                                                                                                          |

|                                                        |                                                                 |                                                                                                                                                                                  |  |                                                                                                                                                                                                                                                                 |
|--------------------------------------------------------|-----------------------------------------------------------------|----------------------------------------------------------------------------------------------------------------------------------------------------------------------------------|--|-----------------------------------------------------------------------------------------------------------------------------------------------------------------------------------------------------------------------------------------------------------------|
|                                                        |                                                                 |                                                                                                                                                                                  |  | Prod. 2020, 83, 1374-1382.                                                                                                                                                                                                                                      |
| <i>Phoma</i> sp. YUD17001<br>and <i>Armillaria</i> sp. | Ascomycota vs.<br>Basidiomycota/Pleosp<br>orales vs. Agaricales | phomretone A (N) <b>12</b><br>phomretone B (N) <b>13</b><br>phomretone C (N) <b>14</b><br>phomretone D (N) <b>15</b><br>phomretone E (N) <b>16</b><br>phomretone F (N) <b>17</b> |  | Li, H.-T.; Liu, T.;<br>Yang, R.; Xie, F.;<br>Yang, Z.; Yang, Y.;<br>Zhou, H.; Ding, Z.-T.<br>Phomretones A–F, C<br>12 polyketides from<br>the co-cultivation of<br><i>Phoma</i> sp. YUD17001<br>and <i>Armillaria</i> sp.<br>RSC Adv. 2020, 10,<br>18384-18389. |

**Figure S1.** Structures of compounds isolated from co-culturing pairing. Refer to Supporting Information Table S1.

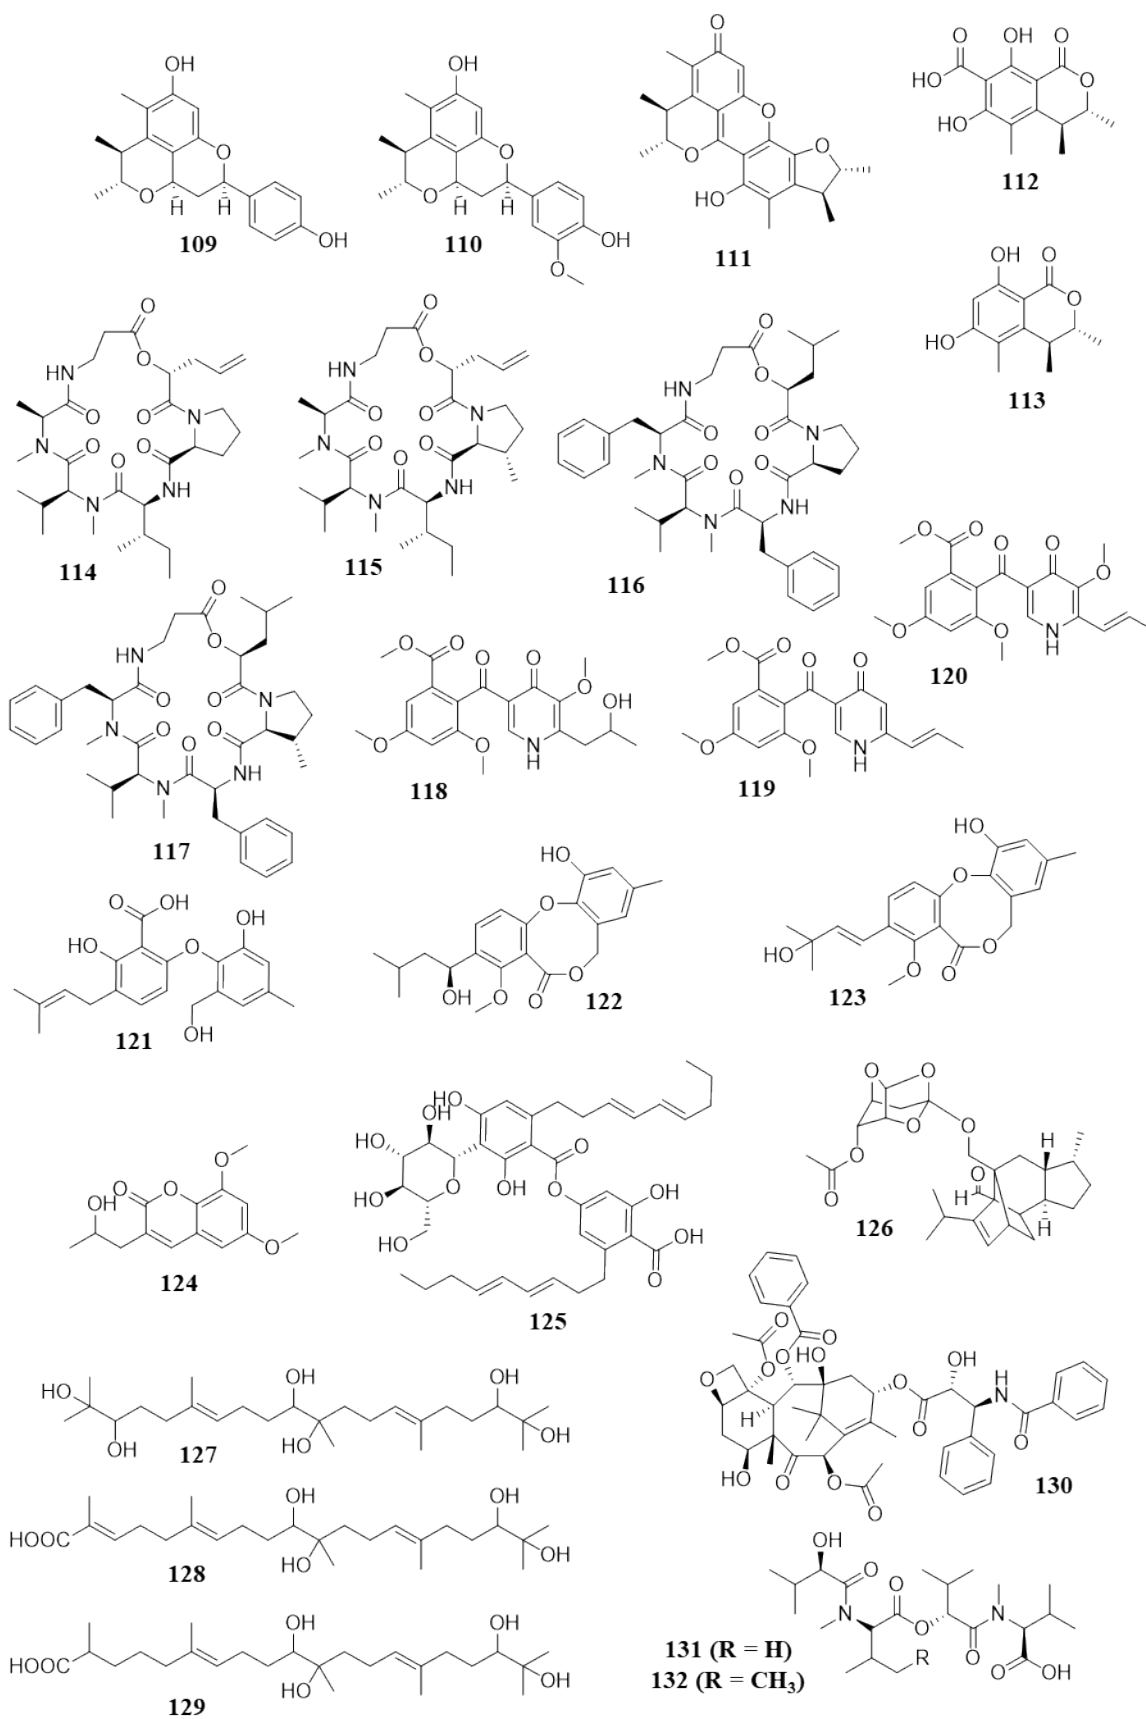

Continued....



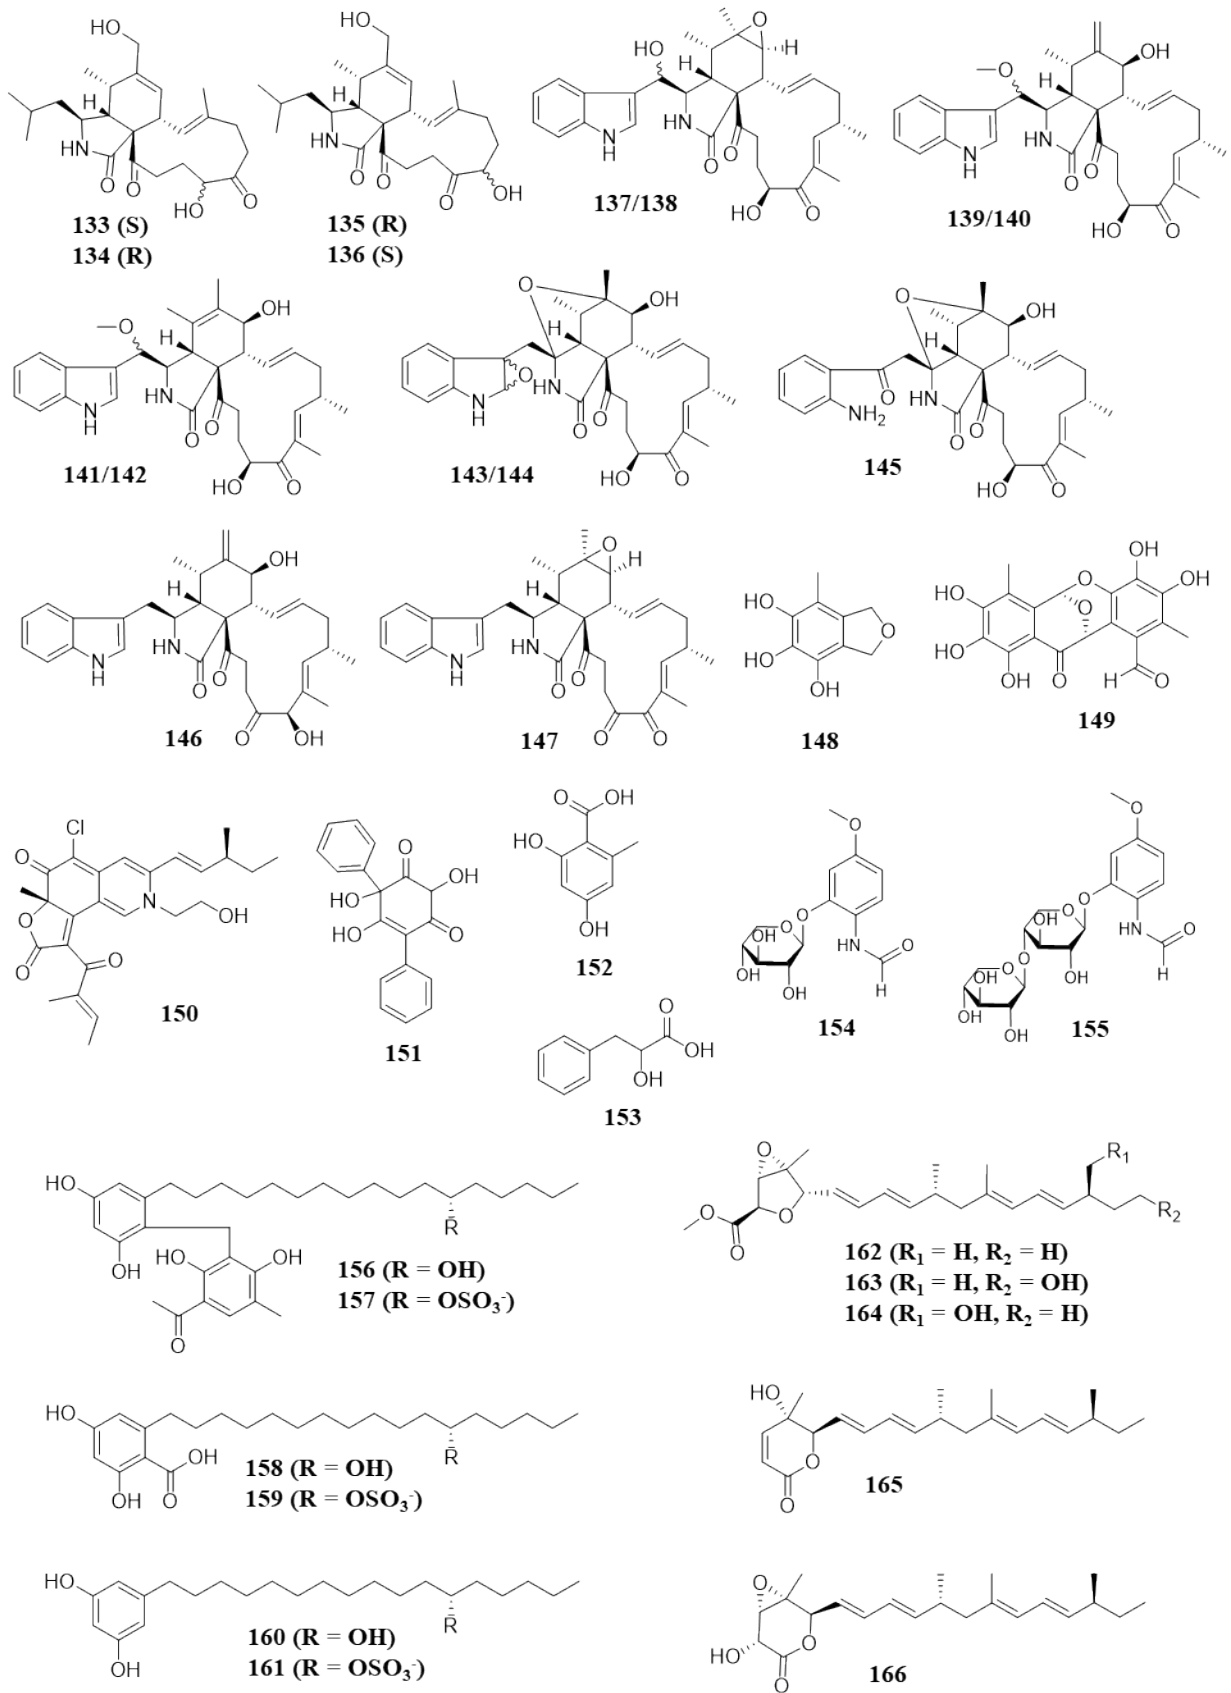

Continued....

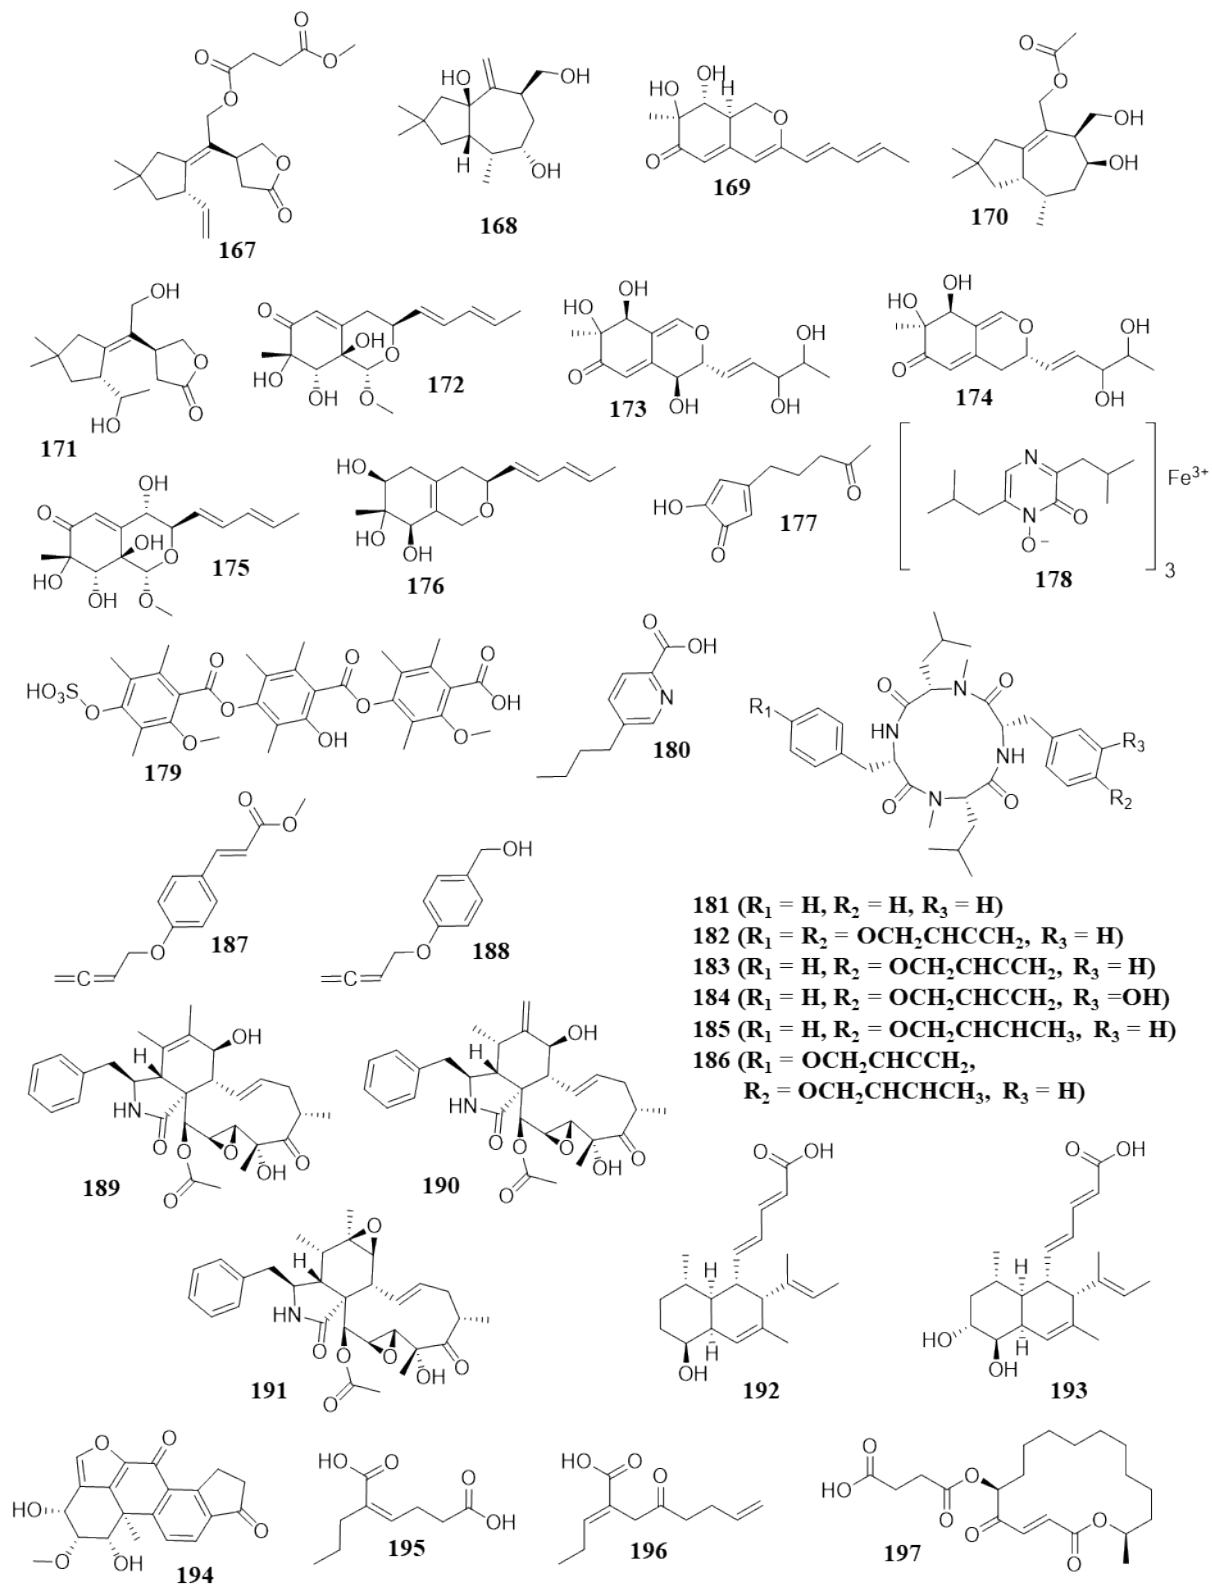

Supplement: NP-039-D1NP00070E-s001.pdf [file NP-039-D1NP00070E-s001.pdf]
